# Supplementary material
Source: PubMed Central journal article supplement (PMC6022664)

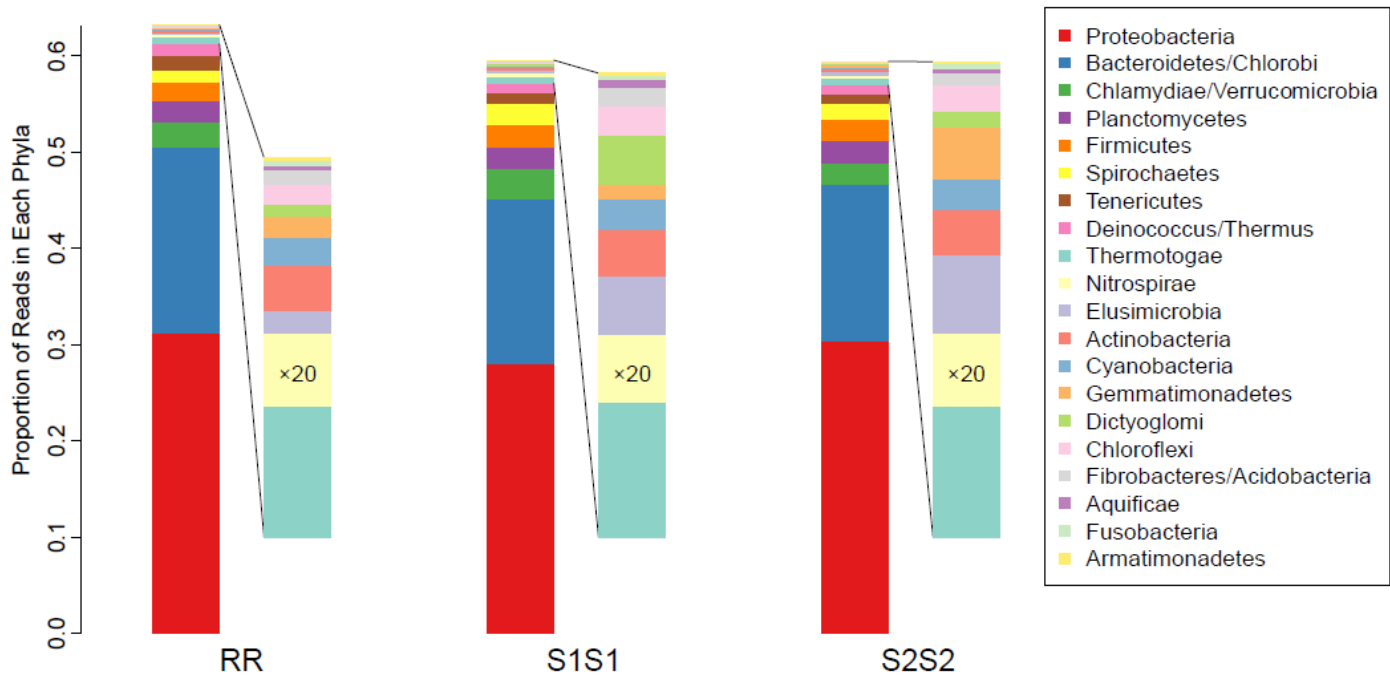

Figure S1

Supplement: esy014_suppl_supplementary_figure_s1.pdf [file esy014_suppl_supplementary_figure_s1.pdf]
